# Supplementary material
Source: PubMed Central journal article supplement (PMC18967)
Supplement: pnas_250289597_1.pdf [file pnas_250289597_1.pdf]

**Table 1.** *MyHC-IIa* intron-exon boundaries

| Exon number | Exon size, bp    | 3' splice site               | 5' splice site              | Intron number | Intron size, bp |
|-------------|------------------|------------------------------|-----------------------------|---------------|-----------------|
| 1           | 204*             |                              | GGA GGA GCG gtgagtagaatccca | 1             | 98              |
| 2           | 144              | tttcctgtttaccag ACT CTG ACA  | ATG ATC TAC gtgagtgtcccctgc | 2             | 1972            |
| 3           | 157              | ttttccttctcatag ACC TAT TCA  | CTG ACT G.. gtgagttagccgaat | 3             | 1218            |
| 4           | 28               | taatttctttttag .AC CGA GAG   | CTG ATC AC. gtaagtagattttat | 4             | 83              |
| 5           | 115              | gttttgatttgacag ..T GGA GAA  | AAA ATA CAG gtgagtctgattgtc | 5             | 98              |
| 6           | 93               | ctcttgcccttgacag GGG ACT CTG | TCT CGC TTT gtaagtctctggac  | 6             | 549             |
| 7           | 64               | agcttttatttcaag GGT AAA TTC  | GAA ACA T.. gtaagtgttcagata | 7             | 124             |
| 8           | 99               | tttgtttccttccag .AT CTG CTA  | CTT ATT G.. gtaagaaatgtcata | 8             | 2177            |
| 9           | 104              | gtttcctgtacttag .AA ATG CTT  | GCC ACA GAT gtaagtagaacacaa | 9             | 527             |
| 10          | 139              | tggttatattgacag AGT GCT ATT  | ACA GAA G.. gtatcaactaagtca | 10            | 365             |
| 11          | 119              | ctttcttctttttag .TT GCT GAC  | GTA GAA CAG gtaggtgcataattc | 11            | 89              |
| 12          | 150              | attttgtcttttaag GTG TCC AAC  | ATT TTT GAT gtgagttttagctg  | 12            | 1369            |
| 13          | 171              | tatctatttatttag TTC AAC AGC  | ATC GAG AAG gttggttttgcattt | 13            | 122             |
| 14          | 310              | tggtctgctttttag CCT ATG GGC  | GAA GGA G.. gtaatgctcaaatgt | 14            | 626             |
| 15          | 77               | ttcctttttcttcag .AG GGA GCT  | CTT TTC AGA gtaaggaagaaattg | 15            | 1164            |
| 16          | 88               | ttcctggttttacag GAG AAT TTG  | ACT CCT G.. gtaagaaattccata | 16            | 87              |
| 17          | 118              | aatatgcatttttag .GT GCC ATG  | AAA CAG AG. gtcagtttctcctga | 17            | 1440            |
| 18          | 124              | tatgtacttcaacag ..A TAC AAG  | CAC ACC AAG gtaattttctgtaaa | 18            | 87              |
| 19          | 137              | tctttccattcacag GTC TTT TTC  | GAG AGA AG. gtataaaaaatagt  | 19            | 1396            |
| 20          | 256              | tcaattaaatttcag ..G GAG GCC  | GTT CAG GCT gtgagttggaatc   | 20            | 1558            |
| 21          | 243              | tgtttccaacttaag GAA GCC GAA  | GAA AAC AAG gtatcaatcatattc | 21            | 91              |
| 22          | 177              | tcttcacctttag GTG AAA AAC    | GTG GAT GAT gtaagtctggtatca | 22            | 82              |
| 23          | 146              | ataatttatatttag CTT GAA GGG  | CTC AAA AA. gtaagtaagaaagaa | 23            | 83              |
| 24          | 91               | ctacttttctaaaag ..G AAA GAG  | GAA TTG CAA gtaagtacatgattt | 24            | 82              |
| 25          | 390              | ttccaccattccag GCC CGC ATT   | AAA GCC AAG gtactacaaattctg | 25            | 815             |
| 26          | 127              | ctttttcttctatag GGA AAC CTA  | GAA TCT G.. gtaactctcccctct | 26            | 691             |
| 27          | 119              | tcttttgtccatcag .GT GAG TTT  | GAG ATA AAA gtaattatgattcta | 27            | 142             |
| 28          | 197              | taactgcctccatag GCC AAG AAC  | GAG GCC AA. gtatgtgcacagata | 28            | 722             |
| 29          | 184              | tgtataatattcaag ..G AAG AAG  | TTC GAT AAG gtaattcctccagca | 29            | 76              |
| 30          | 166              | gtcttggtttttcag ATC CTG GCA  | TTA CAG C.. gtaagtcctatcat  | 30            | 102             |
| 31          | 126              | ttactcaaacaacag .AG GAG ATT  | GAA GCA GAG gtacatgtaaaattg | 31            | 158             |
| 32          | 309              | cttgctgtcattaag GCA TCT CTT  | ATC CTC AAG gtaaatatgtccaag | 32            | 87              |
| 33          | 204              | tggtttggtttcacag GAT ACC CAG | CAC ACC CAG gtgggattcagcaca | 33            | 581             |
| 34          | 126              | attctttttaaacag AAC ACC AGC  | ATC ACT GAT gtgagtggcaggcac | 34            | 92              |
| 35          | 171              | ttatttgctatttag GCC GCC ATG  | GAG GCC AGG gtgggtctccaata  | 35            | 83              |
| 36          | 105              | cctacttatttgcag GTA CGG GAG  | ACT TAC CAG gtacagccagtagtt | 36            | 122             |
| 37          | 96               | tttataatctttcag ACG GAA GAA  | GAG GAG GCT gtaagtatttttaag | 37            | 1657            |
| 38          | 283 <sup>†</sup> | catttttattctcag GAG GAA CAA  |                             |               |                 |

\*Calculated from the first A of the ATG initiating codon.

<sup>†</sup>Third base of stop codon is 153 bp after exon-intron junction.
