# Supplementary material
Source: PubMed Central journal article supplement (PMC18967)
Supplement: pnas_250289597_2.pdf [file pnas_250289597_2.pdf]

**Table 2.** PCR primers used to amplify and to analyze the different exons of the *MyHC-IIa* gene

| Exon  | Left primer                     | Right primer                    | Product size, bp |
|-------|---------------------------------|---------------------------------|------------------|
| 1–2   | 5'-TATAGTATGGTGAACAGTAGAC-3'    | 5'-ACCTATTTATGCTCAGTGGAAGAA-3'  | 677              |
| 3     | 5'-TGGAAGGGTGAGGTGGGAGGATT-3'   | 5'-AAATACACCAGCCTCAACTAAAAG-3'  | 468              |
| 4–6   | 5'-AGCCCTAAAGGTTGCAAAGTCCAG-3'  | 5'-TAATAGAATGGGAATGAAAAAGAT-3'  | 634              |
| 7–8   | 5'-TTCTACCTGATGCAAATACTCTC-3'   | 5'-AGGCACATAAACTTGACAAAA-3'     | 516              |
| 9     | 5'-GCTTCAGCCGGTCCCTCTATT-3'     | 5'-ACTCCAAGGGGCATGTCCATT-3'     | 366              |
| 10    | 5'-GAATCTTCAGAGGGTATGC-3'       | 5'-GAAAATTCCTGGGTAACAA-3'       | 416              |
| 11–12 | 5'-AAGAGATATTTAAAACACTG-3'      | 5'-GTCCTTCACTAATTCCTTCAT-3'     | 544              |
| 13    | 5'-TATCTGTAATATAAAGGCTCTTG 3'   | 5'-AAAGCAGACCACAACACA-3'        | 399              |
| 14    | 5'-TCATCGAGAAGGTTGGTTT-3'       | 5'-TCACTAGCTTCAATTTAACATCAC-3'  | 510              |
| 15    | 5'-AAATAAGATTCATTCAGGCTCAAT-3'  | 5'-AATAGAAGTTCAGAAAAACAGACC-3'  | 298              |
| 16–17 | 5'-ATTTTATAGACACCAATGACTGCT-3'  | 5'-TGTGACAAAACATAACAAGTAGAGG-3' | 474              |
| 18–19 | 5'-TGGTTGCCAAAGGGTTGA-3'        | 5'-TTAACTGTAAGCCATTTCA-3'       | 575              |
| 20    | 5'-GACCATCATCCCGAAATA-3'        | 5'-TGCAATTACCCAACTCAT-3'        | 491              |
| 21–22 | 5'-CTCTTATCCATTGTGAAGTATTTTC-3' | 5'-GCTAAATATAAATTATGTTGAATC-3'  | 657              |
| 23–24 | 5'-AAGTGGATGATGTAAGTCTGGTAT-3'  | 5'-GCGGGCCTGGGAATGGTG-3'        | 501              |
| 25    | 5'-TGGCTCGGAGGCAGTTATGAC-3'     | 5'-GCCCTGTGCAAACATGATGTGT-3'    | 517              |
| 26    | 5'-TTATTTTGGGGAGAAGTTACAGTA-3'  | 5'-CCTTGCACATAGGTCAGGTGTC-3'    | 364              |
| 27    | 5'-CATGGGCTTGCAGAATCTTGT-3'     | 5'-CTATGGAGGCAGTTACACC-3'       | 322              |
| 28    | 5'-CTGATTCTACATGGAGCCTGTTAT-3'  | 5'-TGAGCATTTGTGGACTAAT-3'       | 400              |
| 29–30 | 5'-AATTCATATTATGGTTCCTTC-3'     | 5'-TGTTGTTTGGAGTAAAAGACAGG-3'   | 576              |
| 31    | 5'-CCCGTTCCCTTGGCACTGAG-3'      | 5'-TGTCTTTTTATTCACTCTATGC-3'    | 402              |
| 32    | 5'-TGAATAAAAAGACACATAGCA-3'     | 5'-AAACCATCATTGAGACATC-3'       | 483              |
| 33    | 5'-GGCCCTGAGGAACACTACA-3'       | 5'-GAAAACCTCAGGCTTATCTATT-3'    | 401              |
| 34–35 | 5'-TGACTTGCAAATTTTTATCTGA-3'    | 5'-CATTACGCTTTTGCTCACTCTCA-3'   | 616              |
| 36–37 | 5'-ATGGAGCAGACCGTGAAG-3'        | 5'-TGTTAAATATGCATGCAGTAGTCT-3'  | 612              |
| 38    | 5'-CTCCATAGATGCCAAGTCCT-3'      | 5'-CAGCCTTAAAGTGTGGCCGTAGAC-3'  | 505              |
